# Supplementary material for: Chiral information transfer by solid–solid interaction: application for absolute configuration assignment
Source: Royal Society of Chemistry journal article supplement (doi:10.1039/b209281f), 2002-12-19
Supplement: b209281f.pdf [file b209281f.pdf]

Electronic Supplementary Material

“Chiral Information Transfer by Solid-Solid Interaction:  
Application for Absolute Configuration Assignment”

Yasutaka Tanaka, Yoshinobu Murakami and Riemi Kiko

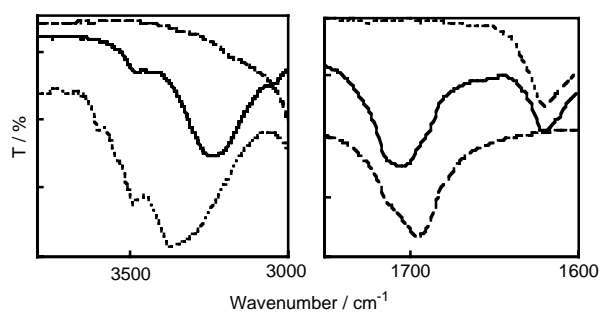

**Fig.** IR spectra of a ground mixture of **1a** and 2-methylglutaric acid (solid line), **1a** (dotted line), and 2-methylglutaric acid (dashed line) in a Nujol mull.

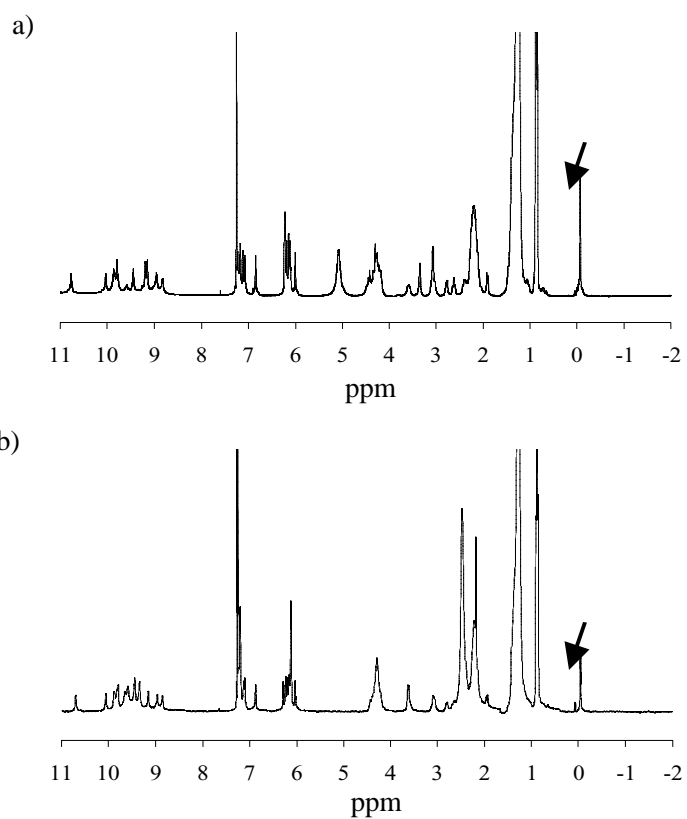

**Fig.**  $^1\text{H}$  NMR spectra ( $\text{CDCl}_3$ ) of a) the authentic complex of **1a** and methyl- $\beta$ -D-glucopyranoside and b) a ground mixture of **1a** and methyl- $\beta$ -D-glucopyranoside. The arrows indicate the upfield shifted methyl resonance of the glycoside.
